# Supplementary material for: TRPA1 activation leads to neurogenic vasodilatation: involvement of reactive oxygen nitrogen species in addition to CGRP and NO
Source: PubMed Central journal article supplement (PMC4945766; doi:10.1111/bph.13519), 2016-06-21
Supplement: BPH-173-2419-s001.pdf [file BPH-173-2419-s001.pdf]

## Supporting Information for Online Publication Only

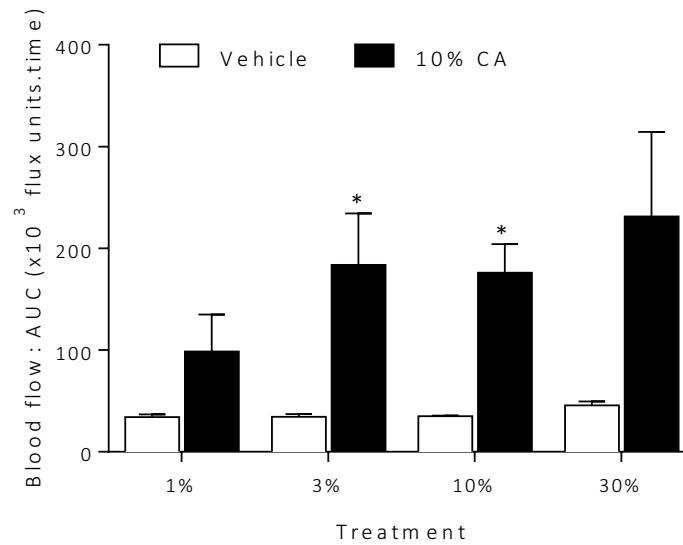

**Figure S1 Dose-response curve for cinnamaldehyde (CA)-induced blood flow responses.** Blood flow was measured in response to topical application of 20 $\mu$ l of cinnamaldehyde (1-30%) and vehicle (10% DMSO in ethanol) in the anaesthetised WT mice ear. Results were recorded over 30 min and analysed as area under the curve (AUC). All errors indicate SEM. (n=5). \*p<0.05 vs vehicle-treated (two-tailed Student's t-test).

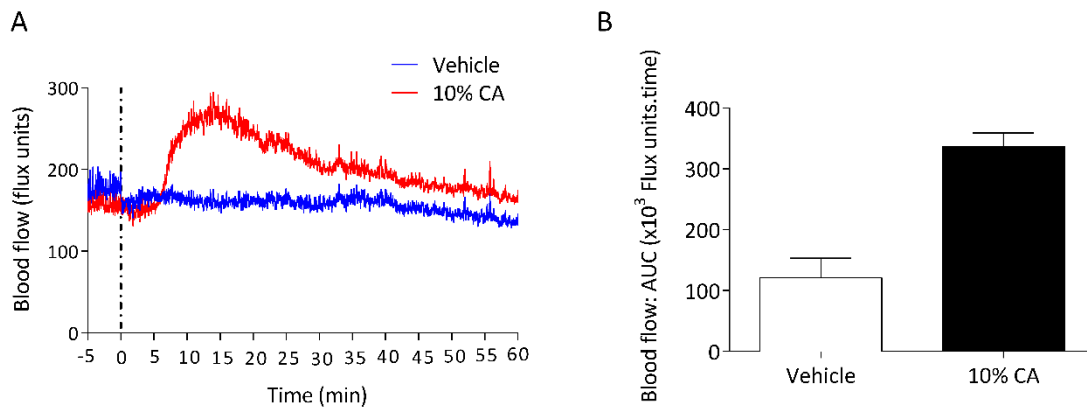

**Figure S2 Effect of 10% cinnamaldehyde (CA)-induced blood flow responses.** Blood flow was measured in response to topical application of 20 $\mu$ l of cinnamaldehyde (10%) and vehicle (10% DMSO in ethanol) in the anaesthetised WT mice ear. (A) Representative blood flow trace of CA-induced response in WT mouse. Dotted line represent topical administration of CA or vehicle. (B) Group mean data for CA-induced vasodilatation in WT mice for blood flow responses recorded over 60 min and analysed as area under the curve (AUC). All errors indicate SEM (n=4).

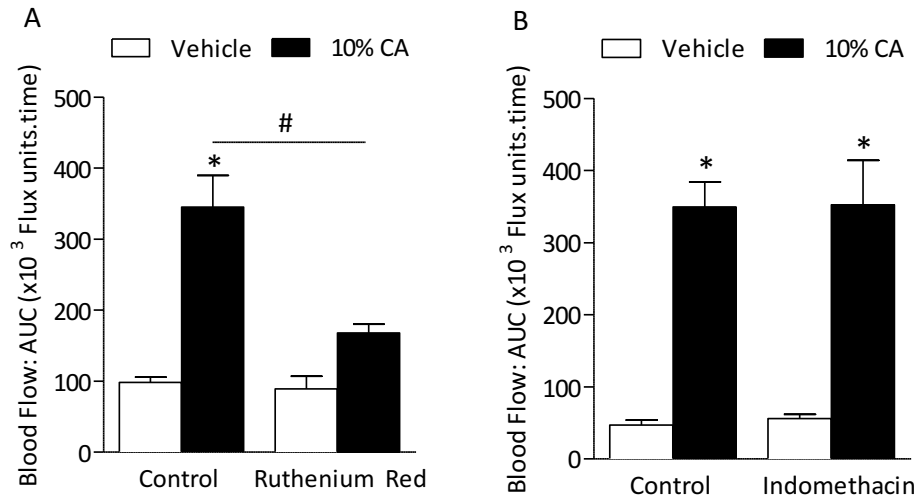

**Figure S3** Effects of inhibitors on cinnamaldehyde-induced vasodilatation. Blood flow was measured in response to topical cinnamaldehyde (10% CA) and vehicle (10% DMSO in ethanol) in the anaesthetised mouse ear. Results recorded over 30 min and analysed as area under the curve (AUC). **(A)** WT mice were pre-treated with the non-selective cation channel blocker ruthenium red ( $3\text{mg kg}^{-1}$ ) or control (saline). **(B)** WT mice were pre-treated with the non-selective cyclooxygenase inhibitor indomethacin ( $20\text{mg kg}^{-1}$ ) or control (5% or 0.05%  $\text{NaHCO}_3$  in saline). Data shows mean  $\pm$  SEM. \* $p < 0.05$  vs vehicle-treated, # $p < 0.05$  vs CA-treated ears of WT mice (2-WAY ANOVA, Bonferroni *post hoc* test).

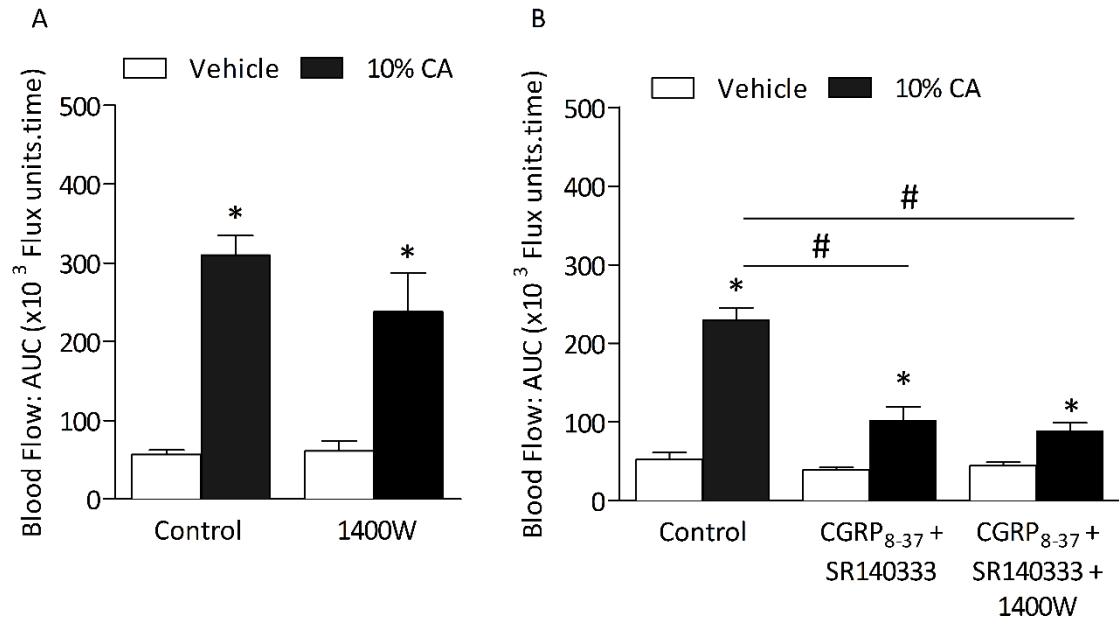

**Figure S4 Cinnamaldehyde (CA)-induced vasodilatation is not dependent on iNOS-derived nitric oxide.** Blood flow was measured in response to topical application of 20 $\mu$ l of cinnamaldehyde (10% CA) and vehicle (10% DMSO in ethanol) in the anaesthetised mouse ear. Results were recorded over 30 min and analysed as area under the curve (AUC). Group mean data for CA-induced vasodilatation in WT mice pre-treated with (A) the selective iNOS inhibitor 1400W alone (3mg kg<sup>-1</sup>, n=9) or control (saline, n=9) and (B) a combination of 1400W (3mg kg<sup>-1</sup>) with CGRP<sub>8-37</sub> (400nmol kg<sup>-1</sup>) and SR140333 (480nmol kg<sup>-1</sup>) or control (saline, n=5-7). All errors indicate SEM. \*p<0.05 vs vehicle-treated, #p<0.05 vs CA-treated ears of WT mice (2-WAY ANOVA, Bonferroni *post hoc* test).

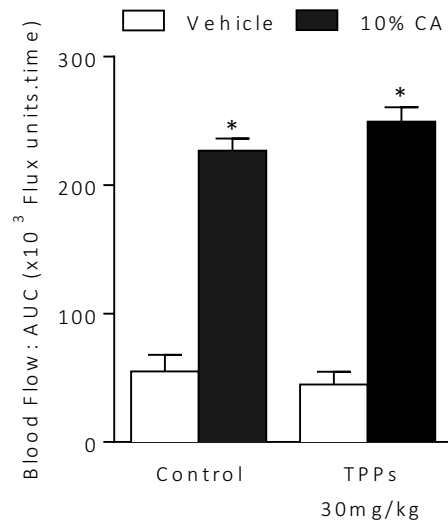

**Figure S5 Effects of Tetraphenylporphinesulfonate (TPPS) on cinnamaldehyde (CA)-induced vasodilatation.** Blood flow was measured in response to topical application of  $20\mu\text{l}$  of cinnamaldehyde (10% CA) and vehicle (10% DMSO in ethanol) in the anaesthetised mouse ear. Results were recorded over 30 min and analysed as area under the curve (AUC). Group mean data for CA-induced vasodilatation in WT mice pre-treated with TPPS ( $30\text{mg kg}^{-1}$ ,  $n=5$ ) or control (saline,  $n=5$ ). All errors indicate SEM. \* $p < 0.05$  vs vehicle-treated ears of WT mice (2-WAY ANOVA, Bonferroni *post hoc* test).

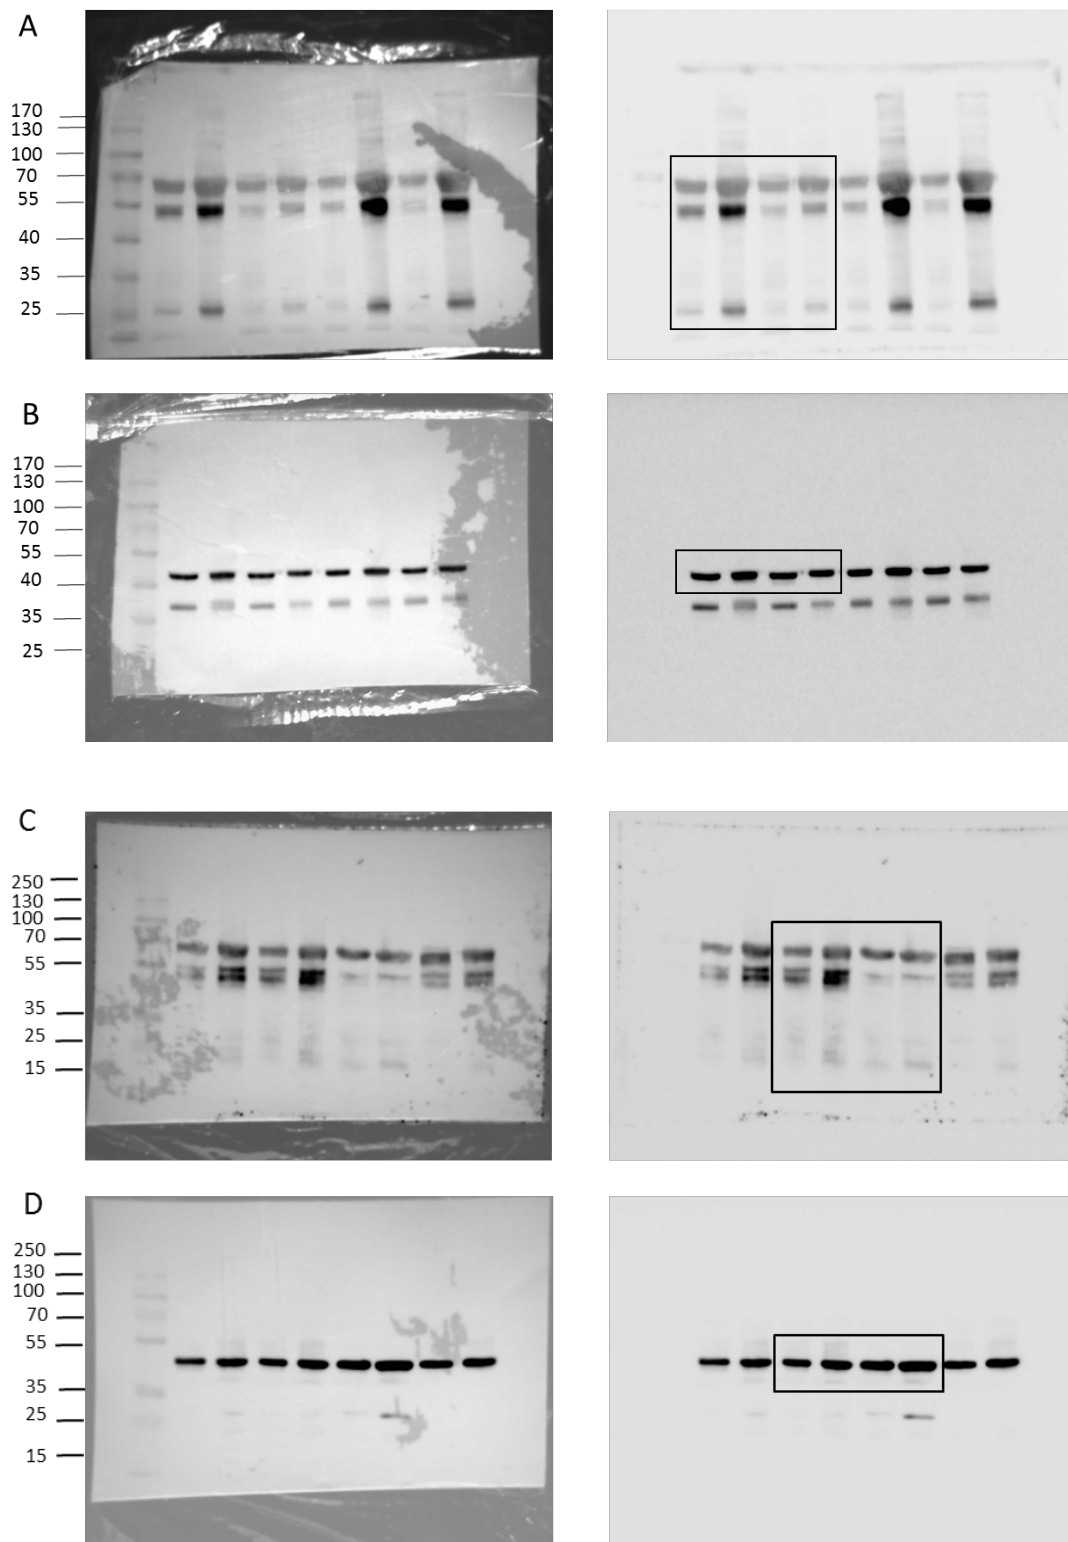

**Figure S6: Uncropped immunoblots for Figure 5C-D displayed in the main figures.** Immunoblots are developed using Syngene gel doc digital dark room system. A digital image of the membrane is acquired, following which, the immunoblot is developed to reveal the probed protein bands (kDa). *(A)* A merged image of the captured membrane and developed nitrotyrosine immunoblot (left panel), and uncropped immunoblot for nitrotyrosine for Figure 5C (right panel). *(B)* A merged image of the captured membrane and developed  $\beta$ -actin

immunoblot (left panel), and uncropped immunoblot for  $\beta$ -actin for Figure 5C (right panel) for vehicle and cinnamaldehyde-treated tissue samples in WT mice pre-treated with FeTPPS ( $30\text{mg kg}^{-1}$ ) or control. **(C)** A merged image of the captured membrane and developed nitrotyrosine immunoblot (left panel), and uncropped immunoblot for nitrotyrosine for Figure 5D (right panel). **(D)** A merged image of the captured membrane and developed  $\beta$ -actin immunoblot (left panel), and uncropped immunoblot for  $\beta$ -actin for Figure 5D (right panel) for vehicle and cinnamaldehyde-treated tissue samples in TRPA1 WT and KO mice. Boxed areas indicate the cropped regions displayed in Figure 5C-D.
